# Supplementary material for: Next Generation-Targeted Amplicon Sequencing (NG-TAS): an optimised protocol and computational pipeline for cost-effective profiling of circulating tumour DNA
Source: PubMed Central journal article supplement (PMC6320579; doi:10.1186/s13073-018-0611-9), 2019-01-04
Supplement: 13073_2018_611_MOESM1_ESM.pdf [file 13073_2018_611_MOESM1_ESM.pdf]

## Supplementary Figures

**Fig. S1** – Schematic overview of the computational pipeline to identify somatic mutations in NG-TAS data from longitudinal samples.

**Fig. S2** - Representative image of the Bioanalyser gel plot. The 8plex PCR products were analysed using Bioanalyser for primer efficiency and quality control.

**Fig. S3** - Fragment size distribution according to the Bioanalyser results for cfDNA extracted from the media where NA12878 cells were grown (main peak at around 160-170bp).

**Fig. S4** – (A) Percentage of amplicons having more than 100x coverage for 2, 5 and 10 ng of input cfDNA from NA12878 sample. (B) Percentage of reads on target for 2, 5 and 10 ng of input cfDNA from NA12878 sample.

**Fig. S5** – Detailed representation of mutations identified in tumour or plasma samples of 21 metastatic breast cancer cases. The colour gradient indicates the VAF as indicated; PT = primary tumour, M = metastasis biopsy, V1...n = plasma.

# Fig S1

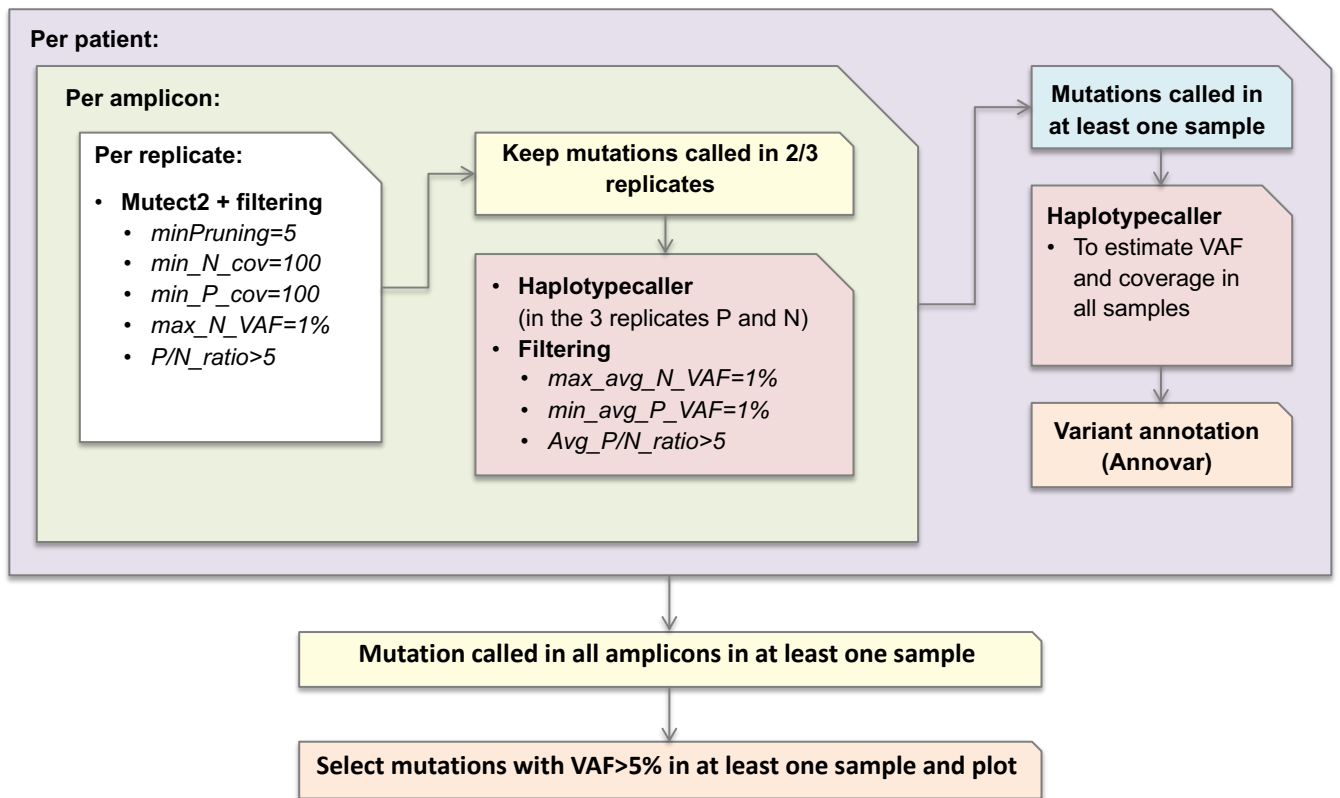

**Fig S2**

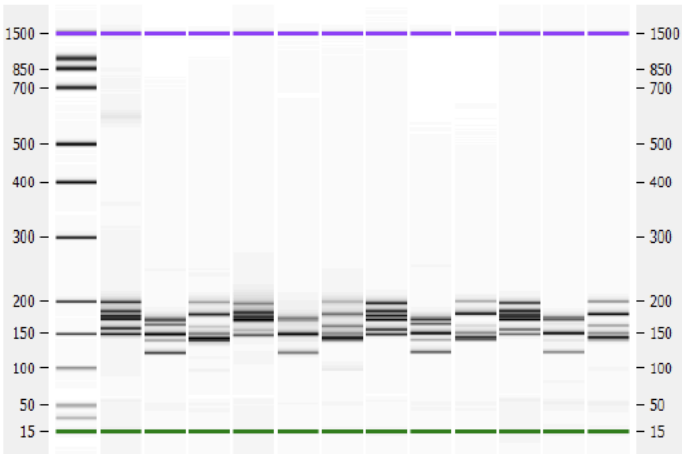

**Fig S3**

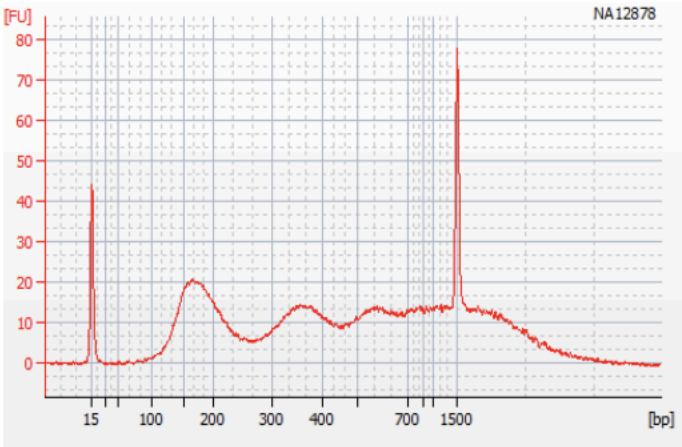

**Fig S4**

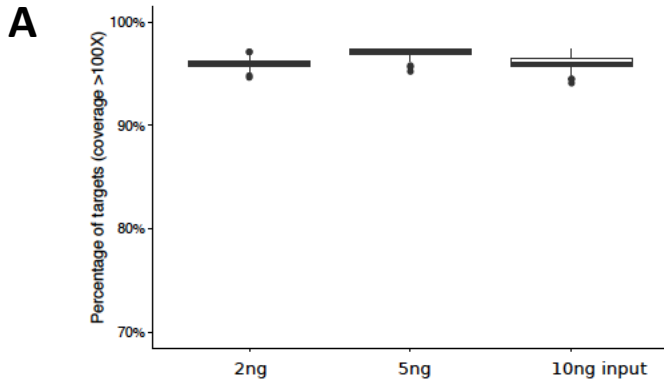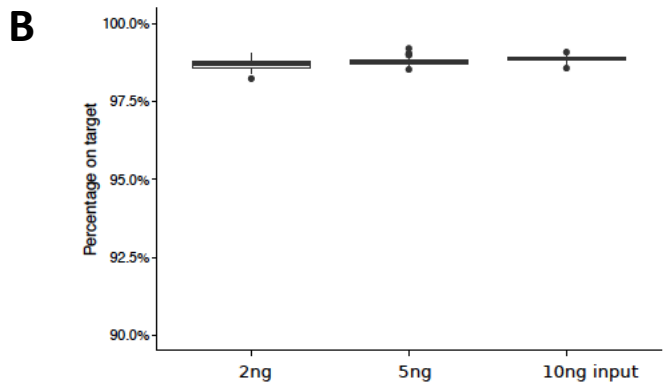

Fig S5

P1

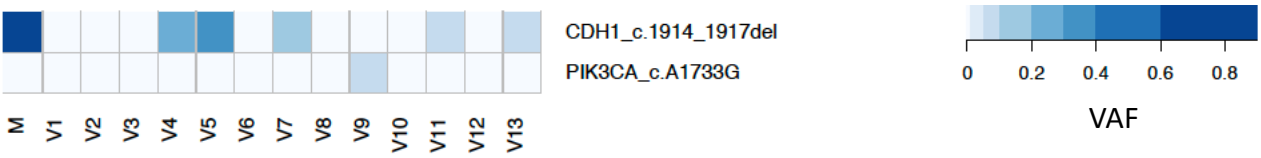

P4

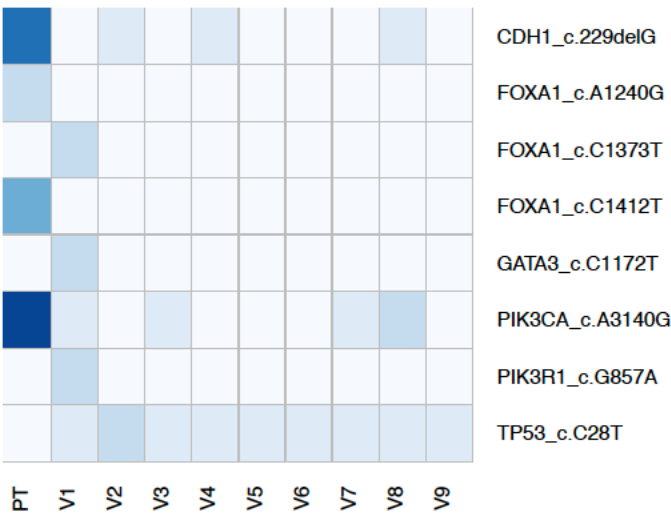

P6

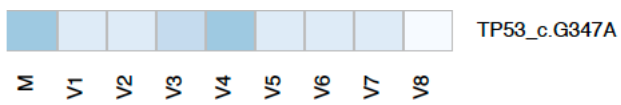

P8

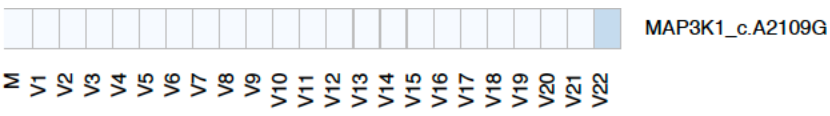

P9

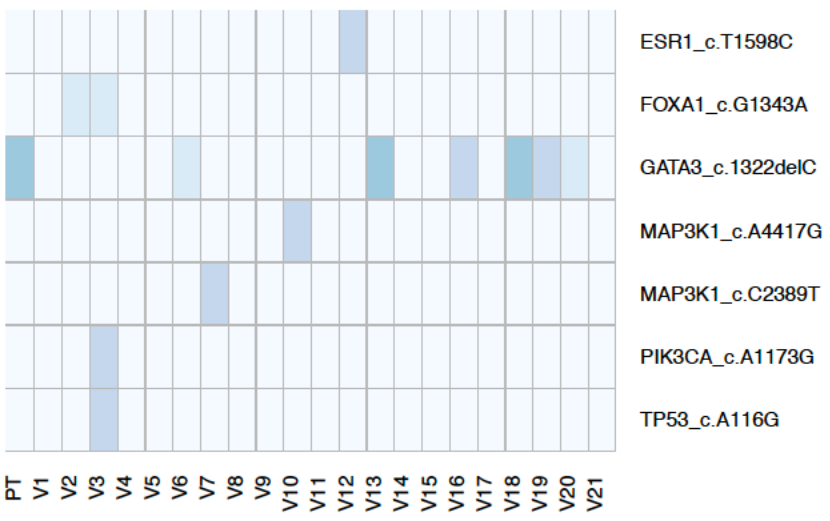





## P19

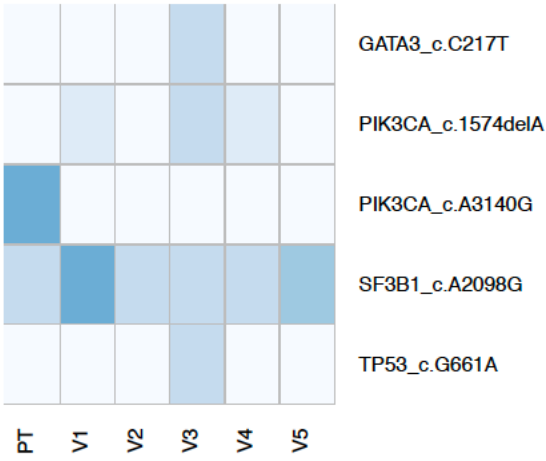

## P20

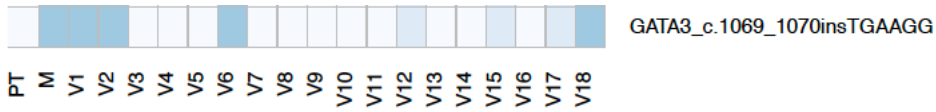

## P21

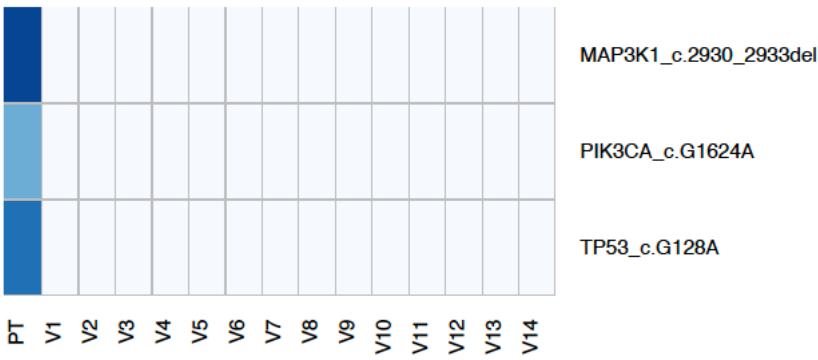

## P24

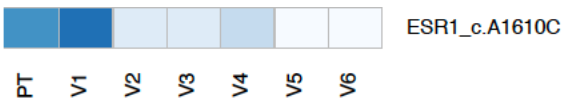

## P27

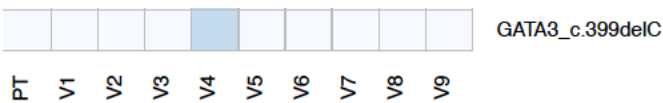



## P29

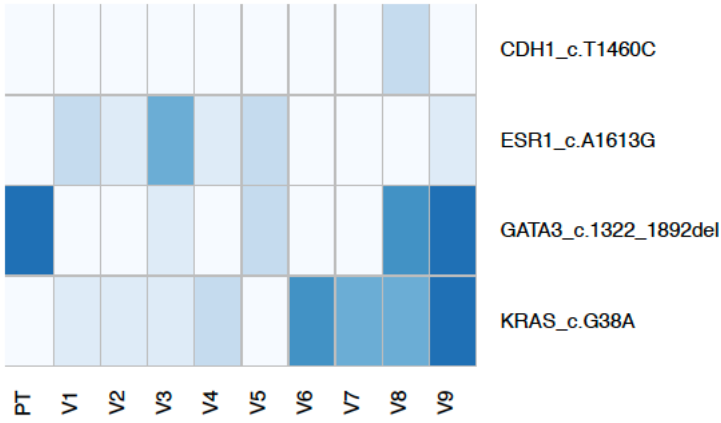

## P30

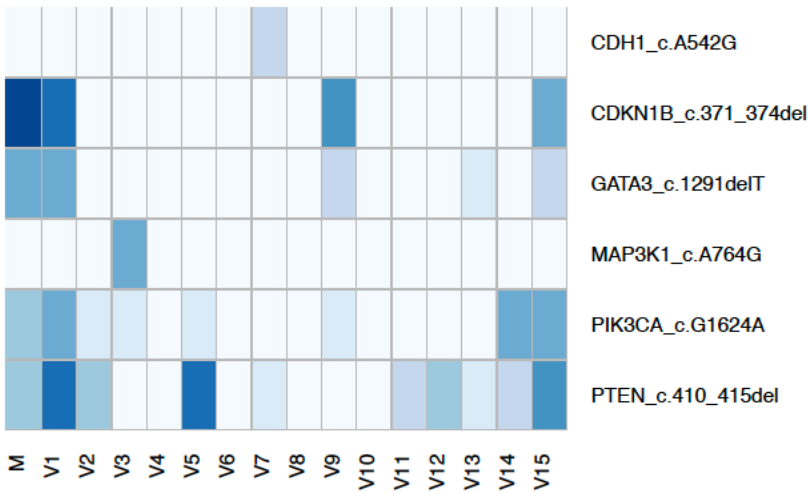

## P31

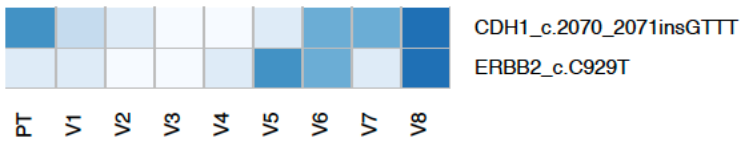

## P34

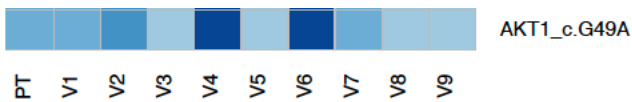

## P37

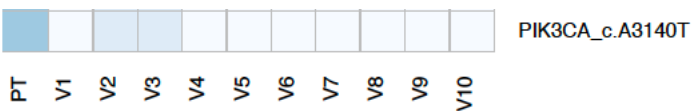

**Table S1: The proportion of NA12878 and NA11840 for the generation of the cfDNA dilution series with expected VAF**

| Expected VAF (%) | NA12878 | NA11840 |
|------------------|---------|---------|
| 50               | 100     | 0       |
| 40               | 80      | 20      |
| 30               | 60      | 40      |
| 20               | 40      | 60      |
| 10               | 20      | 80      |
| 5                | 10      | 90      |
| 2.5              | 5       | 95      |
| 1                | 2       | 98      |
| 0.5              | 1       | 99      |
| 0.25             | 0.5     | 99.5    |
| 0.1              | 0.2     | 99.8    |
| 0                | 0       | 100     |

**Table S2: Primers and Probes for PIK3CA and ESR1 hotspot mutations for digital PCR**

| Gene   | Assay                 | F Primer                      | R Primer                        | WT probe (5' VIC/3' MGB) | Mutant probe (5' 6-FAM/3' MGB) |
|--------|-----------------------|-------------------------------|---------------------------------|--------------------------|--------------------------------|
| PIK3CA | p.E545K (c.1633 G>A)  | GCAATTTCTACACGAGATCC<br>TCTCT | CATTTTAGCACTTACCTGTGA<br>CTCCAT | TGAAATCACTGAGCAGGAG      | TGAAATCACTAAGCAGGA             |
|        | p.H1047R (c.3140 A>G) | AAGAGGCTTTGGAGATATTC<br>ATGAA | TGTTTAATTGTGTGGAAGAT<br>CCAATC  | CAAATGAATGATGCACATC      | TGATGCACGTCATGGT               |
| ESR1   | p.D538G (c.1613 A>G)  | AGGCATGGAGCATCTGTAC<br>A      | TTGGTCCGTCTCCTCCA               | TGGTGCCCTCTATGACCTG      | CCCTCTATGGCCTGCTGCT            |
